# Supplementary material for: GATA6-AS1 via Sponging miR-543 to Regulate PTEN/AKT Signaling Axis Suppresses Cell Proliferation and Migration in Gastric Cancer
Source: Hindawi journal article supplement (doi:10.1155/2023/9340499), 2023-05-26
Supplement: f1 [file 9340499.f1.pdf]

A

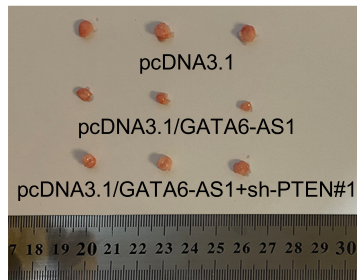

B

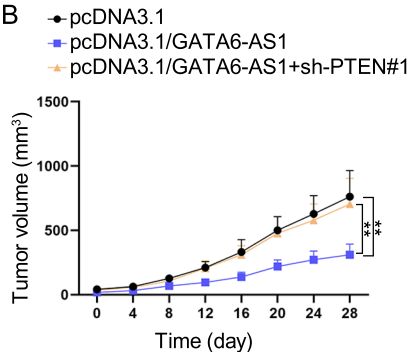

C

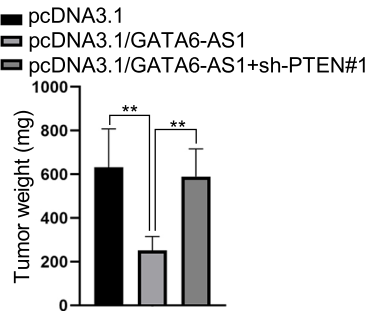

D

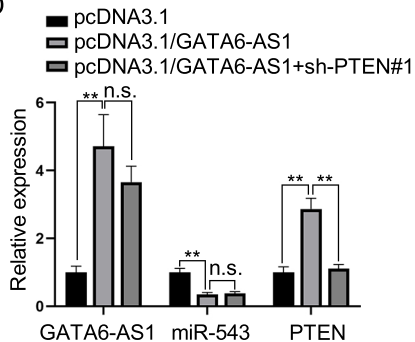

E

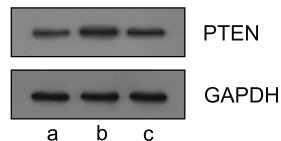

a ■ pcDNA3.1  
 b ■ pcDNA3.1/GATA6-AS1  
 c ■ pcDNA3.1/GATA6-AS1+sh-PTEN#1
